# Supplementary material for: The role of endosome evasion bypass in the reversal of multidrug resistance by lipid/nanoparticle assemblies
Source: Royal Society of Chemistry journal article supplement (doi:10.1039/c3tb00386h), 2013-01-01
Supplement: c3tb00386h.pdf [file c3tb00386h.pdf]

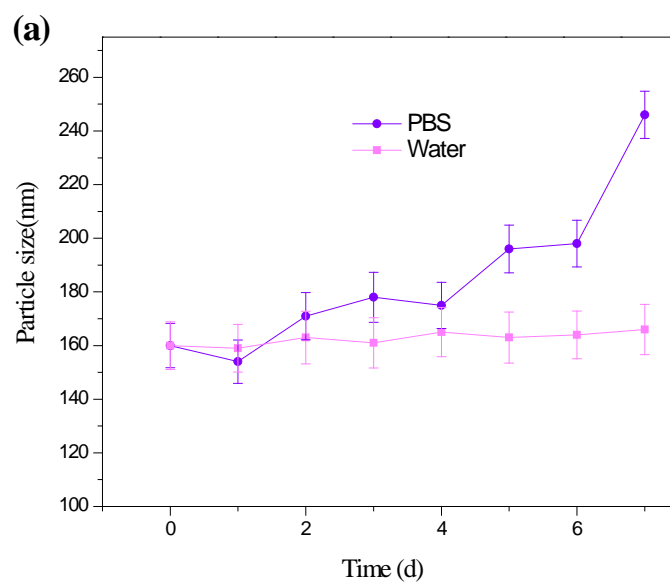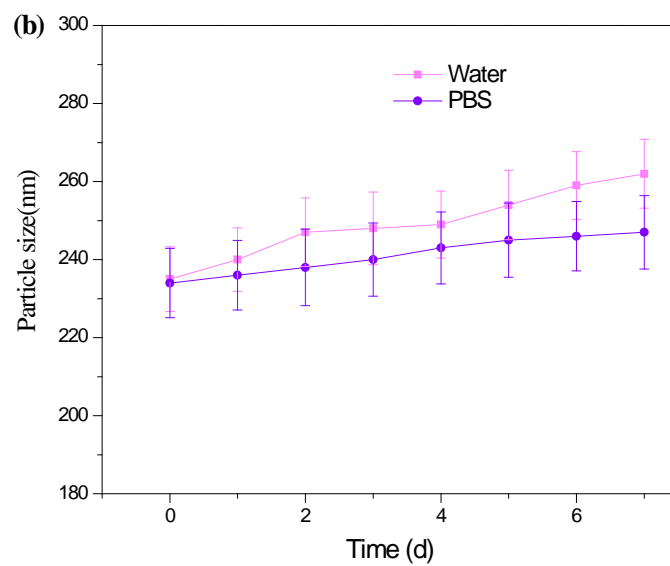

Fig.1 Nanoparticles and LNPs size in water and pH7.4 PBS. (a: Nanoparticles, b: LNPs)

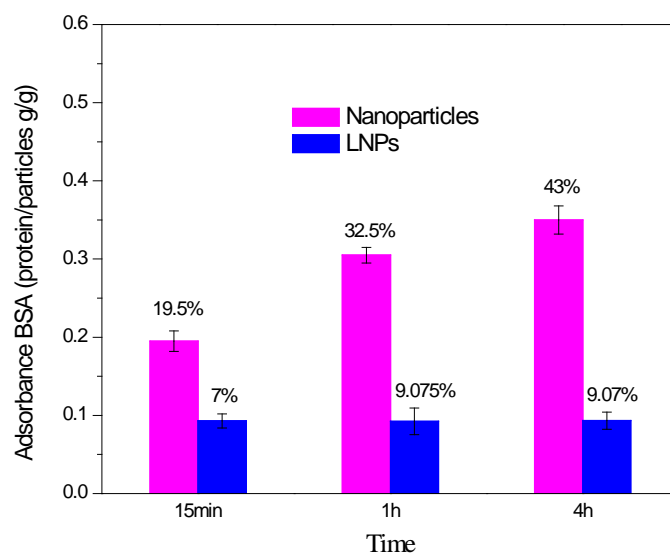

Fig. 2 The BSA absorption of nanoparticles and LNPs in PBS containing 5% wt of BSA after coincubing for 15 min, 1 h, 4 h, the amount of adsorbed BSA was depicted by histogram of protein/particles ration with adsorption percentage in the top.
